1 **Investigating the likely association between genetic ancestry and COVID-19**

2 **manifestations**

3 Ranajit Das\* and Sudeep D. Ghate

4 Yenepoya Research Centre, Yenepoya (Deemed to be University), Mangalore, Karnataka,

5 India.

6

7

8 \* All correspondence to

9 Dr. Ranajit Das

10 Yenepoya Research Centre

11 Yenepoya (Deemed to be University)

12 University Road, Deralakatte

13 Mangalore 575018

14 Karnataka, India

15

16

17

18

19

20

21

22

23

24

25

26

27

28

29

30

31

32

33

34

## 35 **Abstract**

36

### 37 Background

38 The novel coronavirus: severe acute respiratory syndrome coronavirus 2 (SARS-CoV-2) has  
39 spread rapidly throughout the world leading to catastrophic consequences. However, SARS-  
40 CoV-2 infection has shown discernible variability across the globe. While in some countries  
41 people are recovering relatively quickly, in others, recovery times have been comparatively  
42 longer and number of individuals succumbing to it are high. This variability in coronavirus  
43 disease 2019 (COVID-19) susceptibility is suggestive of a likely association between the  
44 genetic-make up of affected individuals modulated by their ancestry and the severity of  
45 COVID-19 manifestations.

### 46 Objective

47 In this study, we aimed to evaluate the potential association between an individual's genetic  
48 ancestry and the extent of COVID-19 disease presentation employing Europeans as the case  
49 study. In addition, using a genome wide association (GWAS) approach we sought to discern  
50 the putative single nucleotide polymorphism (SNP) markers and genes that may be likely  
51 associated with differential COVID-19 manifestations by comparative analyses of the  
52 European and East Asian genomes.

### 53 Method

54 To this end, we employed 10,215 ancient and modern genomes across the globe assessing  
55 597,573 SNPs obtained from the databank of Dr. David Reich, Harvard Medical School,  
56 USA to evaluate the likely correlation between European ancestry and COVID-19  
57 manifestations. Ancestry proportions were determined using qpAdm program implemented in  
58 AdmixTools v5.1. Pearson's correlation coefficient ( $r$ ) between various ancestry proportions  
59 of European genomes and COVID-19 death/recovery ratio was calculated and its significance  
60 was statistically evaluated. Genome wide association study (GWAS) was performed in  
61 PLINK v1.9 to investigate SNPs with significant allele frequency variations among European  
62 and East Asian genomes that likely correlated with differential COVID-19 infectivity.

### 63 Results

64 We found significant positive correlation ( $r=0.58$ ,  $P=0.03$ ) between West European hunter  
65 gatherers (WHG) ancestral fractions and COVID-19 death/recovery ratio for data as of 5<sup>th</sup>  
66 April 2020. This association discernibly amplified ( $r=0.77$ ,  $P=0.009$ ) upon reanalyses based  
67 on data as of 30<sup>th</sup> June 2020, removing countries with small sample sizes and adding those  
68 that are a bridge between Europe and Asia. Using GWAS we further identified 404 immune

69 response related SNPs by comparing publicly available 753 genomes from various European  
70 countries against 838 genomes from various Eastern Asian countries. Prominently, we  
71 identified that SNPs associated with immune-system related pathways such as interferon  
72 stimulated antiviral response, adaptive and innate immune system and IL-6 dependent  
73 immune responses show significant differences in allele frequencies [Chi square values  
74 ( $\geq 1500$ ;  $P \approx 0$ )] between Europeans and East Asians.

#### 75 Conclusion

76 So far, to the best of our knowledge, this is the first study investigating the likely association  
77 between host genetic ancestry and COVID-19 severity. These findings improve our overall  
78 understanding of the putative genetic modifiers of COVID-19 clinical presentation. We note  
79 that the development of effective therapeutics will benefit immensely from more detailed  
80 analyses of individual genomic sequence data from COVID-19 patients of varied ancestries.

81

82 **Key words:** Genomic ancestry; COVID-19 host genetics; COVID-19 manifestations; novel  
83 coronavirus; Genome Wide Association study (GWAS)

84

#### 85 Introduction

86

87 The novel coronavirus, severe acute respiratory syndrome coronavirus 2 (SARS-CoV-2), was  
88 officially identified on 7<sup>th</sup> January 2020 in Wuhan, China [1]. Since then, it has spread  
89 rapidly throughout the world leading to devastating consequences. Notably, COVID-19,  
90 caused by SARS-CoV-2 has shown significant worldwide variability, especially in terms of  
91 the death/recovery ratio that pertains to a ratio of the number of deaths caused by it to  
92 numbers of infected individuals who have recovered within the same time interval. While  
93 affected individuals in some parts of the world have recovered relatively quickly with lower  
94 morbidities, those from various other regions appear to remain sick for longer with slower  
95 recovery times, more debilitating consequences and demonstrate relatively higher  
96 death/recovery ratios [2]. For instance, Verity *et al.* (2020) estimated an overall fatality ratio  
97 of 2.7% for COVID-19 cases reported outside of mainland China. For people with travel  
98 history to mainland China this ratio was 1.1% and those without any travel history to China  
99 the ratio was 3.6% [3]. This is suggestive of a likely population level genetic variation in  
100 terms of susceptibility to SARS-CoV-2 and COVID-19 manifestations.

101           A case in point in this context appears to be *ACE2* that encodes for angiotensin I  
102    converting enzyme 2 demonstrated to be the host receptor for the SARS-CoV-2 [4,5].  
103    Recently, Cao *et al.* analysed 1700 variants in *ACE2* from The China Metabolic Analytics  
104    Project (ChinaMAP) and 1000 Genomes Project databases [6]. Their study revealed  
105    significant variation in allele frequencies among the populations assessed, notably among  
106    people of East Asian and European ancestries. They speculated that the differences in allele  
107    frequencies of *ACE2* coding variants, likely associated with its elevated expression may  
108    influence *ACE2* function and putatively impact the susceptibility, symptoms, and outcome of  
109    SARS-CoV-2 infection in evaluated populations. Additionally, a majority of the 15  
110    expression quantitative trait loci (eQTL) variants they identified had discernibly higher allele  
111    frequencies among East Asian populations compared to Europeans, which may suggest  
112    differential susceptibility towards SARS-CoV-2 in these two populations under similar  
113    conditions. Stawiski *et al.* who performed a comprehensive analysis on >290,000 samples  
114    representing > 400 populations, also identified natural *ACE2* variants that can potentially  
115    alter the virus-host interaction and thus alter host susceptibility towards COVID-19  
116    manifestations [7]. While some of these variants can potentially increase susceptibility for  
117    COVID-19, others were speculated to be protective and surmised to display decreased  
118    binding to SARS-CoV-2 spike protein and thus decrease susceptibility to infection.

119           In addition to *ACE2*, COVID-19 manifestations may also be modulated by several  
120    immune response modulating genes. Li *et al.* reviewed the interaction between coronaviruses  
121    and the innate immune systems of the hosts [8]. It was speculated that coronavirus infection  
122    can result in secretion of higher amounts of chemokines and cytokines such as interleukins  
123    (IL-1, IL-6, IL-8, IL-21), Tumor necrosis factor (TNF)- $\beta$  and monocyte chemoattractant  
124    protein-1 (MCP-1) in infected cells. Further, the hosts' major antiviral machinery, largely  
125    composed of interferons (IFNs) can also act to restrain SARS-CoV-2 infection. Overall it  
126    may be speculated that variations in host genes involved in its antiviral response may be  
127    responsible for differential clinical presentation of COVID-19. Recently, genetic variability  
128    across major histocompatibility complex (MHC) class I genes [9] and apolipoprotein E  
129    (*APoE*) [10] have also been associated with severity of COVID-19 manifestations.

130           Further recent studies have shown that variants associated with immune  
131    responsiveness display significant population-specific signals of natural selection [11]. In  
132    particular, the authors showed that admixture with Neanderthals may have differentially  
133    shaped the immune systems in European populations, introducing novel regulatory variants,  
134    which may affect preferential responses to viral infections. European genomes were further

135 modulated and distinguished owing to multiple waves of migration throughout their ancient  
136 past. We note here that while Neolithic European populations predominantly descended from  
137 Anatolian migrants, European ancestry shows a distinct West–East cline in indigenous West  
138 European hunter gatherers (WHGs) [12]. At the same time Eastern Europe was in the  
139 rudimentary stages of the formation of Bronze Age steppe ancestry, which later spread into  
140 Central and Northern Europe through East-West expansion [13]. Further, high genetic  
141 substructure between North-Western and South-Eastern hunter-gatherers has also been  
142 documented recently [14].

143 Ancestry specific variation in immune responsiveness and its potential genetic and  
144 evolutionary determinants are poorly understood especially in the context of SARS-CoV-2  
145 infection and COVID-19 disease manifestations. In addition, despite its broad implications in  
146 identifying novel variants putatively associated with variation in host immune responses  
147 across different ancestries, only a handful of genome wide association study (GWAS) have  
148 been performed pertaining to viral infections, especially in the context of SARS-CoV-2  
149 infection [15].

150 Here we aimed to unravel the potential association between host genetic ancestry and  
151 COVID-19 disease employing Europeans as the case study. In addition, using a GWAS  
152 approach we sought to discern the putative single nucleotide polymorphism (SNP)s, genes  
153 and pathways that may be potentially associated with differential COVID-19 infection by  
154 comparative analyses of the European and East Asian genomes. To the best of our  
155 knowledge, so far this is the first study to assess the relationship between host genetics and  
156 SARS-CoV-2 severity comparing individuals from distinct ancestries.

157

## 158 **Method**

159

### 160 **Dataset**

161

162 Genome data for the current study was obtained from the personal database of Dr. David  
163 Reich’s Lab Harvard Medical School, USA [16]. The final dataset comprised of 10,215  
164 ancient and modern genomes across the globe assessing 597,573 single nucleotide  
165 polymorphisms (SNPs). File conversions and manipulations were performed using  
166 EIGENSTRAT (EIG) v7.2 [17] and PLINK v1.9 [18].

167 COVID-19 data was obtained from 2019 Novel Coronavirus COVID-19 Data  
168 Repository by The Center for Systems Science and Engineering, Johns Hopkins (JHU-CSSE)

169 [2]. The data available in this web portal as of Sunday, 5<sup>th</sup> April 2020, 6 PM was used in the  
170 primary analyses. To evaluate the robustness of our results, we repeated our analyses with the  
171 data available in Johns Hopkins CSSE web portal as of 30<sup>th</sup> June 2020, 4:33 AM. Indian  
172 state-wise data was obtained from John Hopkins CSSE portal and confirmed through  
173 Government of India coronavirus portal as of 30<sup>th</sup> June 2020 [19].

174

175 Ancestry proportions in European genomes and COVID-19 manifestations

176

177 We employed whole genome data from ten European countries in the initial analyses (Table  
178 1). During reanalysis, countries such as Norway, Czech Republic and Ukraine were removed  
179 due to smaller sample size (N<15). Instead, Eastern European countries such as Romania,  
180 Bulgaria, and those that bridge between Europe and Asia such as Georgia, Turkey and  
181 Armenia were included. Further, UK that did not provide officially updated COVID-19  
182 recovery information was excluded during reanalysis. Furthermore, a larger sample size was  
183 employed for Italians (TSI) obtained from 1000 genomes project database (Table 2).

184 We used *qpAdm* [20] implemented in AdmixTools v5.1 [21,22] to estimate ancestry  
185 proportions in the European genomes originating from a mixture of ‘reference’ populations  
186 by utilizing shared genetic drift with a set of ‘outgroup’ populations. 14 ancient genomes  
187 namely *Luxembourg\_Loschbour.DG*, *Luxembourg\_Loschbour\_published.DG*,  
188 *Luxembourg\_Loschbour*, *Iberia\_HG* (N=5), *Iberia\_HG\_lc*, *Iberia\_HG\_published*,  
189 *LaBrana1\_published.SG*, *Hungary\_EN\_HG\_Koros* (N=2),  
190 *Hungary\_EN\_HG\_Koros\_published.SG* were grouped together as West European Hunter-  
191 Gatherers (WHGs); three ancient genomes namely *Russia\_EHG*, *Russia\_HG\_Samara* and  
192 *Russia\_HG\_Karelia* (N=2) were grouped together as Mesolithic hunter-gatherers of Eastern  
193 Europe (EHGs); two ancient genomes: *KK1.SG*, *SATP.SG* were grouped as Caucasus hunter-  
194 gatherers (CHGs) and *Sweden\_HG\_Motala* (N=8) were renamed as Scandinavian Hunter-  
195 Gatherers (SHGs) in *qpAdm* analysis. We tried to model modern-day Europeans with  
196 different combinations of Neolithic Near-East populations such as Neolithic Iranians  
197 (*Iran\_GanjDareh\_N*), Neolithic Anatolians (*Anatolia\_N*) and Natufians (*Israel\_Natufian*)  
198 alongside various combinations of ancient European Hunter Gatherer populations (WHG,  
199 EHG, CHG and SHG) as mentioned in Lazaridis et al. (2016) [23]. We inferred that modern-  
200 day Europeans could be best modelled as a combination of three source populations namely  
201 EHG, WHGs and Neolithic Iranians (*Iran\_GanjDareh\_N*) as *Left* (EHG, WHG,  
202 *Iran\_GanjDareh\_N*). We used a mixture of eight ancient and modern-day populations

203 comprising of *Ust Ishim, MAI, Kostenki14, Han, Papuan, Chukchi, Karitiana, Mbutiasour*  
204 *'Right'* outgroup populations (O8).

205 Pearson's correlation coefficient ( $r$ ) between various ancestry proportions of  
206 European genomes and COVID-19 death/recovery ratio was calculated and its significance  
207 was statistically evaluated using GraphPad Prism v8.4.0, GraphPad Software, San Diego,  
208 California USA [24]. Additionally, we developed several linear regression models with  
209 different combinations of WHG ancestry fraction ( $x_1$ ) alongside climatic factors such as 15  
210 days' mean temperatures ( $x_2$ ) and 15 days' mean humidity ( $x_3$ ) of the ten European countries  
211 employed in this study to statistically evaluate their impact on COVID-19 death/recovery  
212 ratio ( $y$ ) using *glm* function implemented in R v3.6.3 (Table 1, Supplemental Table 1). One-  
213 tailed tests were performed considering the alternative hypothesis of positive association of  
214  $x_1$ ,  $x_2$  and  $x_3$  with  $y$  ( $H_A: \beta > 0$ ). The best model was determined by likelihood ratio test  
215 (LRT), employing *lrtest* function, implemented in R package '*epicalc*'. Temperature and  
216 humidity data were obtained from Time and Date.com [25], which garners meteorological  
217 data from leading meteorological institutes such as The World Meteorological Organization  
218 [26] and Meteorological Assimilation Data Ingest System (MADIS) [27]. Ancestry and  
219 COVID-19 death/recovery ratio maps were mapped by country using QGIS version 3.12.3  
220 [28].

221 Notably, the death/recovery ratio was used in this study as the test statistic as it can  
222 potentially best reflect the extent to which individuals have succumbed versus those  
223 recovering owing to COVID-19 infection. We believe that this ratio likely best reflects host  
224 immune responsiveness against viral assault, especially since it does not take into account the  
225 number of active cases and statistical biases arising due to population size, spread of the  
226 disease and under-reporting/under-testing of COVID-19 cases.

227

228 Genome-wide association analyses (GWAS)

229

230 Genome wide association study (GWAS) was performed to identify novel genetic variants  
231 that show significant variation between genomes of European and East Asian ancestries. In  
232 GWAS, European genomes (N=753) with higher death/recovery ratio (Cases) were compared  
233 against Eastern Asian genomes (N=838) with low death/recovery ratio (Controls). To this  
234 end, standard case-control-based association analyses was performed in PLINK v1.9 using --  
235 assoc command. A sorted list of association results will be generated using --adjust flag to the  
236 --assoc command. Chi square test, implemented in PLINK --assoc command, was performed



237 separately for all 597,573 SNPs to statistically assess their significance and for stringency  $P$   
238  $<0.01$  was considered significant. A Manhattan plot was generated in Haploview [29] by  
239 plotting Chi square values of all assessed SNPs to identify the SNPs that are likely associated  
240 with COVID-19 manifestations. Highly significant SNPs were annotated using SNPnexus  
241 web-based server [30].

242

## 243 **Results**

244

245 Ancestry proportions in European genomes and COVID-19 manifestations

246

247 We modelled all Europeans as a combination of three source populations namely EHGs,  
248 WHGs and Neolithic Iranians (see Methods) in *qpAdm* analysis. Among 10 European  
249 populations employed in this study, GBR (British in England and Scotland) genomes were  
250 found to have the highest WHG ancestry proportions (26.1%) (Fig. 1a, Table 1). Notably,  
251 among the European populations evaluated, COVID-19 death/recovery ratio till 5<sup>th</sup> April  
252 2020, was the highest among the British people: death/recovery ratio=31.94 (Fig. 1b, Table  
253 1). However, we omitted GBR genomes in our reanalysis due to absence of updated COVID-  
254 19 recovery information from UK. In contrast, Russian and Finnish populations which could  
255 not be modelled with WHG ancestry so far appear to have less detrimental COVID-19  
256 manifestations with 0.02 and 0.05 death/recovery ratio, respectively (Fig. 1a and 1b).  
257 Consistent with this, we found significant positive correlation (Pearson's Correlation;  $r=0.58$ ;  
258  $P=0.03$ ) between WHG ancestry fraction and COVID-19 death/recovery ratio. The  
259 association discernibly increased ( $r=0.77$ ,  $P=0.009$ ) upon reanalysing the data, omitting  
260 countries with small sample sizes and adding those that form a bridge between Europe and  
261 Asia.

262 Congruent with correlation results, we found significant linear positive association  
263 between WHG ancestry fraction and COVID-19 death/recovery ratio (Model 0) ( $R^2=0.34$ ,  $P$   
264  $=0.039$ ) (Table 1). However, we did not find any association between 15 days' mean  
265 temperature (Model 1) and humidity (Model 2) with COVID-19 death/recovery ratio ( $P$   
266  $=0.49$  and  $0.29$  respectively) (Table 1). Moreover, we found significant association between  
267 the combination of WHG ancestry and temperature (Model 3), WHG ancestry and humidity  
268 (Model 4), and WHG ancestry and a combination of both climatic factors (temperature and  
269 humidity, Model 6) with COVID-19 death/recovery ratio ( $R^2=0.33$ ,  $0.39$  and  $0.4$   
270 respectively) (Table 1). However, in all cases the significance of the test was driven by the



271 WHG ancestry fraction alone ( $P=0.04$ , 0.04 and 0.05 for Model 3, Model 4 and Model 6  
272 respectively) and not by the climatic factors ( $P_{\text{temperature}}=0.54$ ,  $P_{\text{humidity}}=0.23$ , and  
273  $P_{\text{temperature}}=0.61$  and  $P_{\text{humidity}}=0.23$  for Model 3, Model 4 and Model 6 respectively).  
274 Consistent with this, Likelihood Ratio Test (LRT) determined Model 0 to be the best model,  
275 indicating that the extent of COVID-19 disease severity can be best explained by variability  
276 in WHG ancestry fractions among European populations. Model 0 was found to be highly  
277 significantly better than Model 1 (Temperature alone) and Model 2 (Humidity alone) ( $P\approx 0$ )  
278 in recapitulating the variability of COVID-19 death/recovery ratio among the study  
279 populations, suggesting that climatic factors such as colder temperature and variation in  
280 humidity alone cannot explain the variability of COVID-19 disease in European countries.  
281 Further, the combination of ancestry and temperature, ancestry and humidity (Model 3 and 4  
282 respectively), and the combination of ancestry and climate (temperature + humidity) (Model  
283 6) failed to explain variabilities in COVID-19 death/recovery ratio better than ancestry alone  
284 (Model 0) ( $P=0.88$ , 0.36 and 0.61 respectively). This largely eliminates the possibility of  
285 regional climate playing major role in the severity of COVID-19 presentation.

286 The association between WHG ancestry fraction (Model 0) and COVID-19  
287 death/recovery ratio discernibly increased during reanalysis ( $R^2=0.59$ ,  $P=0.009$ ) (Table 2).  
288 Consistent with the initial analysis, we did not find any association between 15 days' mean  
289 temperature (Model 1) and humidity (Model 2) with COVID-19 death/recovery ratio ( $P$   
290  $=0.55$  and  $0.31$  respectively) and found significant association between the combination of  
291 WHG ancestry and temperature (Model 3), WHG ancestry and humidity (Model 4), and  
292 WHG ancestry and the combination of both climatic factors (temperature and humidity,  
293 Model 6) with COVID-19 death/recovery ratio ( $R^2=0.6$ , 0.61 and 0.61 respectively) (Table  
294 2). However, similar to our initial analysis, the significance of the test was driven by the  
295 WHG ancestry fraction alone ( $P=0.01$ , 0.01 and 0.02 for Model 3, Model 4 and Model 6  
296 respectively) and not by the climatic factors ( $P_{\text{temperature}}=0.33$ ,  $P_{\text{humidity}}=0.28$ , and  
297  $P_{\text{temperature}}=0.48$  and  $P_{\text{humidity}}=0.35$  for Model 3, Model 4 and Model 6 respectively) (Table 2).  
298 Finally, congruent with our initial analysis, LRT determined Model 0 to be the best model,  
299 indicating COVID-19 manifestations can be best explained by variability in WHG ancestry  
300 fractions among European populations.

301

302 **Table1:** West European hunter gatherers (WHGs) ancestry fractions, mean temperature (15  
303 days), mean humidity (15 days), and COVID-19 death/recovery ratios of 10 European  
304 countries employed in the study for initial analysis (data obtained for 5<sup>th</sup> April 2020)

| Countries      | Mean Temperature (°C, 15 days') | Mean Humidity (°C, 15 days') | WHG ancestry fraction (%) | Death/R recovery ratio 5 <sup>th</sup> April 2020 | Linear Regression (R <sup>2</sup> , P-value)                                                                                                                                       |
|----------------|---------------------------------|------------------------------|---------------------------|---------------------------------------------------|------------------------------------------------------------------------------------------------------------------------------------------------------------------------------------|
| Norway         | 4.09                            | 75.82                        | 18.2                      | 1.94                                              | WHG ancestry only ( <i>Model 0</i> ) (R <sup>2</sup> =0.34, P=0.03)                                                                                                                |
| United Kingdom | 8.18                            | 69.45                        | 26.1                      | 31.94                                             | Temperature only ( <i>Model 1</i> ) (R <sup>2</sup> =2.402e-05, P=0.49)                                                                                                            |
| France         | 12.64                           | 74.09                        | 20.9                      | 0.49                                              | Humidity only ( <i>Model 2</i> ) (R <sup>2</sup> =0.04, P=0.29)                                                                                                                    |
| Spain          | 10                              | 58.64                        | 21.1                      | 0.33                                              | WHG ancestry + Temperature ( <i>Model 3</i> ) (R <sup>2</sup> =0.34, P <sub>ancestry</sub> =0.04, P <sub>temperature</sub> =0.54)                                                  |
| Italy          | 10                              | 62                           | 23.1                      | 0.73                                              | WHG ancestry + Humidity ( <i>Model 4</i> ) (R <sup>2</sup> =0.39, P <sub>ancestry</sub> =0.04, P <sub>humidity</sub> =0.23)                                                        |
| Greece         | 11.91                           | 74.45                        | 14.6                      | 0.87                                              | Temperature + Humidity ( <i>Model 5</i> ) (R <sup>2</sup> =0.04, P <sub>temperature</sub> =0.54, P <sub>humidity</sub> =0.3)                                                       |
| Czech Republic | 4.91                            | 52.36                        | 23.8                      | 0.79                                              | WHG ancestry + Climate (Temperature + Humidity) ( <i>Model 6</i> ) (R <sup>2</sup> =0.4, P <sub>ancestry</sub> =0.05, P <sub>temperature</sub> =0.61, P <sub>humidity</sub> =0.23) |
| Hungary        | 7.1                             | 49.9                         | 17.2                      | 0.51                                              |                                                                                                                                                                                    |
| Bulgaria       | 3.9                             | 71                           | 16.6                      | 0.49                                              |                                                                                                                                                                                    |
| Ukraine        | 6.8                             | 45.4                         | 17                        | 1.28                                              |                                                                                                                                                                                    |

305

306

307 **Table 2:** West European hunter gatherers (WHGs) ancestry fractions, mean temperature (15

308 days), mean humidity (15 days), and COVID-19 death/recovery ratios of 10 European

309 countries employed in the study for reanalysis (data obtained for 30<sup>th</sup> June 2020)

| Countries | Mean Temperature (°C, 15 days') | Mean Humidity (°C, 15 days') | WHG ancestry fraction (%) | Death/R recovery ratio 30 <sup>th</sup> June | Linear Regression (R <sup>2</sup> , P-value) |
|-----------|---------------------------------|------------------------------|---------------------------|----------------------------------------------|----------------------------------------------|
|-----------|---------------------------------|------------------------------|---------------------------|----------------------------------------------|----------------------------------------------|

| 2020        |       |       |      |      |                                                                                                                                                                             |
|-------------|-------|-------|------|------|-----------------------------------------------------------------------------------------------------------------------------------------------------------------------------|
| Turkey      | 22.9  | 58.3  | 4.2  | 0.03 | WHG ancestry only ( <i>Model 0</i> ) ( $R^2=0.59$ , $P=0.009$ )                                                                                                             |
| Georgia     | 20.67 | 61.17 | 7.2  | 0.02 | Temperature only ( <i>Model 1</i> ) ( $R^2=0.002$ , $P=0.55$ )                                                                                                              |
| France      | 19.27 | 68.82 | 20.9 | 0.42 | Humidity only ( <i>Model 2</i> ) ( $R^2=0.03$ , $P=0.31$ )                                                                                                                  |
| Spain       | 21.09 | 64.09 | 21.1 | 0.19 | WHG ancestry + Temperature ( <i>Model 3</i> ) ( $R^2=0.6$ , $P_{\text{ancestry}}=0.007$ , $P_{\text{temperature}}=0.33$ )                                                   |
| Italy (TSI) | 21    | 71.64 | 22.2 | 0.18 | WHG ancestry + Humidity ( <i>Model 4</i> ) ( $R^2=0.61$ , $P_{\text{ancestry}}=0.007$ , $P_{\text{humidity}}=0.28$ )                                                        |
| Greece      | 23.1  | 58.8  | 14.6 | 0.14 | Temperature + Humidity ( <i>Model 5</i> ) ( $R^2=0.06$ , $P_{\text{temperature}}=0.34$ , $P_{\text{humidity}}=0.27$ )                                                       |
| Armenia     | 18    | 70    | 9.8  | 0.03 | WHG ancestry + Climate (Temperature + Humidity) ( <i>Model 6</i> ) ( $R^2=0.61$ , $P_{\text{ancestry}}=0.01$ , $P_{\text{temperature}}=0.52$ , $P_{\text{humidity}}=0.65$ ) |
| Hungary     | 19.7  | 72.5  | 17.2 | 0.22 |                                                                                                                                                                             |
| Bulgaria    | 16.6  | 76.2  | 16.6 | 0.08 |                                                                                                                                                                             |
| Romania     | 20    | 74.8  | 10.9 | 0.08 |                                                                                                                                                                             |

310

311

312 Genome-wide association analyses (GWAS)

313

314 For GWAS, 753 genomes from across Europe with high COVID-19 death/recovery ratio

315 (case) were compared against 838 Eastern Asian genomes with relatively lower COVID-19

316 death/recovery ratio (control). Out of 597,573 SNPs employed in this study, 385,450 (64.5%)

317 markers revealed highly significant variation (Chi square  $\geq 6.63$ ;  $P < 0.01$ ) between Europeans

318 and East Asians, indicating the discernible differences in the genetic tapestry of the two

319 populations (Fig. 2). For stringency, we annotated only the top 10,000 ranked SNPs

320 ( $N=10,011$ , Chi square  $\geq 739$ ;  $P \leq 9.69 \times 10^{-163}$ ) using SNPnexus web-based server [30]

321 (Supplemental Table 2). Among top 10,000 ranked SNPs, 404 were associated with host

322 immune responsiveness including interferon (IFN) stimulated antiviral response, Interferon-  
323 stimulated gene 15 (*ISG15*) mediated antiviral mechanism and 2'-5' oligoadenylate synthase  
324 (OAS) mediated antiviral response. These 10,000 SNPs are linked to 161 genes associated  
325 with immune system regulation including those related to innate immunity, antiviral response  
326 and receptors (eg. *EDAR*) (Supplemental Table 3). Our results indicate that pathways such as  
327 those involved in immunoregulatory interactions between a lymphoid and a non-lymphoid  
328 cell, adaptive and innate immune system, IL-6 dependent immune responses, and  
329 complement cascades show significant variation between genomes of East Asian and  
330 European ancestry. Among these, type-I interferon and IL-6 dependent inflammatory  
331 immune responses have been shown to be associated with SARS-CoV-2 infection [31].

332 Furthermore, the SNPs with the highest Chi square values ( $\geq 1500$ ;  $P \approx 0$ ) were found  
333 to be associated with immune system related pathways such as Senescence-Associated  
334 Secretory Phenotype (SASP), Interleukin-4 and Interleukin-13 signaling, TNFR2 non-  
335 canonical NF- $\kappa$ B pathway and Class I MHC mediated antigen processing and presentation  
336 (Supplemental Table 4). Among these, Interleukin mediated 'cytokine storm' has been shown  
337 to be associated with pulmonary inflammation among COVID-19 patients [32], and the  
338 genetic variation in Class I MHC has been associated with severity of COVID-19  
339 manifestations [9].

340 Finally, six immune system related SNPs (rs2243250, rs1800872, rs1800896,  
341 rs1544410, rs1800629 and rs1805015) that display significant variability between Europeans  
342 and East Asians (Odds Ratio  $> 2$ , Chi square  $> 40$ ,  $P < 10^{-10}$ ) are likely associated with the  
343 development of immune responses in the first year of life contingent upon the gene-  
344 environment interactions [33].

345

## 346 **Discussion**

347

348 The novel coronavirus SARS-CoV-2 infection has shown discernible worldwide variability.  
349 While in some areas affected individuals are recovering relatively quicker, in others, recovery  
350 times have been comparatively longer, and mortality high. Here, we sought to investigate the  
351 likely association between genetic ancestry determinants and the extent of COVID-19  
352 manifestations employing Europeans as a case study.

353 We found a significant positive correlation ( $r=0.58$ ,  $P=0.03$ ) between West European  
354 hunter gatherers (WHG) ancestral fractions and COVID-19 death/recovery ratio which  
355 discernibly increased ( $r=0.77$ ,  $P=0.009$ ) upon reanalyses as of 30<sup>th</sup> June 2020, removing

356 countries with small sample sizes and including those from intermediate geographical  
357 locations between Europe and Asia, such as Georgia, Armenia and Turkey. We identified 404  
358 immune response related SNPs by comparing publicly available data from 753 genomes  
359 corresponding to various European countries against 838 genomes from various Eastern  
360 Asian countries using GWAS. We found that SNPs associated with immune-system related  
361 pathways such as interferon stimulated antiviral response, adaptive and innate immune  
362 system and IL-6 dependent immune responses show significant differences in allele  
363 frequencies [Chi square values ( $\geq 1500$ ;  $P \approx 0$ )] between Europeans and East Asians.

364

365 The European story

366

367 Europe has been severely impacted owing to the ongoing COVID-19 pandemic. Our findings  
368 revealed a significant positive correlation between WHG-related ancestry and COVID-19  
369 death/recovery ratio ( $P_{initial\ analysis}=0.03$ ,  $P_{reanalysis}=0.009$ ). Further, we found significant linear  
370 positive association between WHG ancestry fraction and COVID-19 death/recovery ratio  
371 ( $R^2_{initial\ analysis}=0.34$ ,  $P_{initial\ analysis}=0.039$ ,  $R^2_{reanalysis}=0.59$ ,  $P_{reanalysis}=0.009$ ). Additionally, we  
372 found that the regional climate alone is unlikely to play a major role in determining the  
373 severity of COVID-19 disease. Previously it has been shown that European genomes evolved  
374 uniquely with regards to immune responsiveness, particularly pertaining to responses against  
375 viral infections [8]. Admixture with Neanderthals is believed to have introduced unique  
376 regulatory variants into European genomes, which potentially regulated immune  
377 responsiveness in European populations [7]. We surmise that the European genome  
378 architecture has been extensively modulated by the complex origin and migration history of  
379 modern-day Europeans during Paleolithic, Mesolithic and Neolithic periods that led to the  
380 introduction of novel variants in European genomes.

381 Modern-day European genomic diversity has been thought to be shaped by variable  
382 proportions of local hunter-gatherer ancestry (WHGs) [34]. While Neolithic, Iberian genomes  
383 (modern day Spanish and Portuguese populations) revealed widespread evidence of WHG  
384 admixture (10-27%), Neolithic German populations (Linearb and keramik– LBK culture)  
385 revealed ~4–5% of the same [34]. Notably the variation in WHG ancestry fractions among  
386 German and Spanish people correlated with the observed variabilities in COVID-19  
387 death/recovery ratio in these two countries; German populations with discernably lower  
388 WHG fractions have a current death/recovery ratio of 0.05, however, in Spain the ratio is  
389 0.19, which corresponded to high WHG fraction among Spanish populations. A similar

390 correlation between WHG ancestry and the extent of COVID-19 manifestations was observed  
391 for the UK, where GBR genomes depicted high WHG ancestry fractions (>25%) and was  
392 correlated with high COVID-19 death/recovery ratio in the country (31.94). We note here  
393 that due to unavailability of official COVID-19 recovery information from the UK since  
394 April 2020, we were unable to include UK in our reanalyses.

395 Italy, one of the worst hit European countries during the COVID-19 pandemic  
396 showed significant nationwide variation in the severity of disease manifestations  
397 (death/recovery ratio=0.18) with a clear gradient in COVID-19 mortality rates from north to  
398 south. While COVID-19 death/recovery ratio in Northern Italy is 0.19, the ratio is 0.15 in  
399 Central Italy and 0.11 in Southern Italy. Interestingly, these numbers are consistent with  
400 WHG fractions among Italian genomes. While Northern Italian genomes have ~23.1% WHG  
401 ancestry fractions, the fraction reduces to 9.2% among Southern Italians (Fig. 1a and 1b).

402 In contrast, although COVID-19 cases have been rising rapidly in Russia, their  
403 death/recovery ratio (0.02) has remained significantly lower than most European countries.  
404 We assessed whether this is owing to their genomic make-up; all modern-day Russians  
405 originated from two groups of East Slavic tribes: Northern and Southern [35] and have 0%  
406 WHG ancestry fraction. They are genetically similar to modern-day other Slavic populations  
407 such as Belarusians [35,36]. Consistent with this we observed significantly low COVID-19  
408 death/recovery ratios in both Russia (0.02) and Belarus (0.01). In addition, COVID-19  
409 manifestations were found to be far less detrimental in the Central Asian countries part of the  
410 erstwhile Soviet Union (USSR) such as Kazakhstan (death/recovery ratio=0.01), Kyrgyzstan  
411 (0.02), Tajikistan (0.01), and Uzbekistan (0.005).

412 Finally, Finnish genomes that were shaped predominantly by migrations from Siberia  
413 ~3500 years ago [36] with very small WHG ancestral fractions, also have a discernibly  
414 smaller COVID-19 death/recovery ratio (0.05) compared to neighboring Sweden, where the  
415 ratio (0.88) is among the highest in world as of 31<sup>st</sup> May, 2020, after which no official  
416 recovery information was available [2]. We note here that hunter gatherer genomes from  
417 Sweden have shown to form a WHG cluster including Loschbour and La Braña2, indicating  
418 high affinity of Swedish genomes towards WHG ancestry [37].

419 Historically, Turkey has been a crossroad of major population migrations across  
420 Eurasia and served as a socio-cultural bridge between Europe and Asia. A whole genome-  
421 based study revealed that while the modern-day Turkish population are genetically similar to  
422 Southern European populations such as Italians, most Turkish genomes show signatures of  
423 recent genetic contribution from ancestral East Asian populations [38]. On the other hand,



424 modern-day Armenians derived 29% of their European ancestry from Tyrolean Iceman [39],  
425 a 5300-year-old Copper age individual, discovered along Tisenjoch Pass of the Ötztal Alps  
426 [40]. Consequently, WHGs who contributed discernible ancestry fractions to most  
427 Europeans, provided very low fraction (<10%) of the same in the ancestries of Near  
428 Easterners (Turkey, Georgia and Armenia) [37]. Consistent with this, COVID-19  
429 death/recovery ratio in Turkey, Georgia and Armenia remained discernibly lower compared  
430 to most European countries (0.03, 0.02 and 0.03 respectively), further underscoring the  
431 importance of WHG-related ancestral components in determining the severity of COVID-19  
432 manifestations.

433 Overall, our results have revealed a clear association between WHG ancestry  
434 fractions and the acuteness of COVID-19 manifestations suggesting the presence of unique  
435 underlying genetic variants in European genomes that maybe correlated with increased  
436 disease susceptibility and immune responsiveness. It is noteworthy that despite being better  
437 equipped in terms of medical facilities and resources for testing and providing care to  
438 COVID-19 affected individuals, most western and central European countries have struggled  
439 substantially with significantly higher death/recovery ratios, as compared to many Asian  
440 countries that are experiencing an increasing burden of patients with chronic underlying  
441 conditions necessitating efficient health care systems with integrated care [41]. This further  
442 illuminate that the intrinsic host genetic make-up as determined by ancestry is a major  
443 determinant of the severity of COVID-19 disease.

444

445 Intrinsic ‘protection’ for East Asians?

446

447 As noted above, significant variation in allele frequencies of *ACE2* encoding for the host cell  
448 receptor of SARS-CoV-2 has been reported between people of East Asian and European  
449 ancestries [6]. The authors of this study speculated that the differences in allele frequencies of  
450 *ACE2* coding variants were likely associated with variable expression of *ACE2* in tissues.

451 Additionally, they reported that most eQTL variants identified by them had discernibly  
452 higher allele frequencies among East Asian populations compared to Europeans, which may  
453 result in differential susceptibility towards SARS-CoV-2 infection in these populations under  
454 similar conditions. Consistent with these findings we identified 404 SNPs that are associated  
455 with host immune response, such as Interferon (IFN) stimulated antiviral response,  
456 Interferon-stimulated gene 15 (ISG15) mediated antiviral mechanism and 2'-5' oligoadenylate  
457 synthase (OAS) mediated antiviral response that showed large differences in allele



458 frequencies between Europeans and East Asians. The genetic differences between East and  
459 Southeast Asians with Europeans can be largely attributed to their distinctive ancestral  
460 origins. Most East Asians derive their ancestry from Mongolian hunter-gatherers who  
461 dispersed over Northeast Asia 6000-8000 years ago [42]. Similarly, Southeast Asians exhibit  
462 a mixture of East Asian ancestry (Southern Chinese agriculturalist) and a diverged form of  
463 Eastern Eurasian hunter-gatherer ancestry (EHGs) [43]. People with similar ancestry can be  
464 found as far south as Indonesia [43]. As noted above EHG ancestry fraction does not appear  
465 to be significantly associated with COVID-19 manifestations. In congruence with their  
466 unique ancestral make-up, all East and Southeast Asian countries exhibit discernibly low  
467 COVID-19 death/recovery ratio compared to most west and central European countries  
468 (Japan=0.06, South Korea=0.02, Hong Kong=0.006, Taiwan=0.01, Thailand=0.02,  
469 Malaysia=0.01 and Singapore=0.0007). Notably, in mainland China, where the novel corona  
470 virus originated, COVID-19 death/recovery ratio has remained discernibly low (0.06).  
471 Overall, our results indicate that people of East and Southeast Asian ancestry appear to be  
472 intrinsically protected against the most debilitating effects of SARS-CoV-2 infection.

473

474 India: a variegated canvas for COVID-19

475

476 Indians have a long and complex history of admixture between immigrant gene-pools  
477 originating primarily in West Eurasia, Southeast Asia and the Indian hunter-gatherer lineage  
478 with close genetic proximity to the present-day Andamanese people (Ancient Ancestral South  
479 Indians: AASI) who likely arrived in India through the “southern exit” wave out of Africa  
480 [44]. People of AASI ancestry admixed with an undivided ancient Iranian lineage that  
481 subsequently split and lead to the formation of early Iranian farmers, herders, and hunter  
482 gatherers approximately in the 3<sup>rd</sup> millennium BCE. This gene pool is referred to as the  
483 ‘Indus Periphery’ gene pool [44,45], which is thought to be the major source of subsequent  
484 peopling of India. Modern-day Indian genome is composed of largely four ancestral  
485 components: Ancestral North Indian (ANI), Ancestral South Indian (ASI), Ancestral Tibeto-  
486 Burman (ATB) and Ancestral Austro-Asiatic (AAA) [46]. ANI and ASI gene pools likely  
487 arose around 2<sup>nd</sup> millennium BCE during the decline of Indus Valley Civilization (IVC),  
488 which prompted multiple waves of migrations across the India. The southward migration of  
489 Middle to Late Bronze Age people from Steppe (Steppe MLBA) into India is thought to have  
490 coincided with the decline of IVC. It is speculated that the people of Indus-Periphery-related  
491 ancestry, while migrating northward, admixed with Steppe MLBA immigrants to form the

492 ANI, while the others, who migrated southward and eastward admixed with AASI and  
493 formed the ASI [45]. Austroasiatic speakers originated in Southeast Asia and subsequently  
494 migrated to India during the Neolithic period. The admixture between local Indians and  
495 incoming Southeast Asians took place ~2000-3800 years ago giving rise to the AAA  
496 ancestry. Notably, the Indian population(s) with whom the incoming Southeast Asians  
497 mingled were AASI related with little to no West Eurasian ancestry fraction [47]. Finally, it  
498 has been showed that the Tibeto-Burmans (ATBs) derived their ancestry through admixture  
499 with low-altitude East Asians who migrated from China and likely across Northern India or  
500 Myanmar [48] leading to the high genomic proximity between Indians of ATB ancestry and  
501 East Asians.

502 We believe that the severity of COVID-19 disease presentation is likely to vary  
503 appreciably across the Indian populations. The genomic proximity between East Asians and  
504 Indians mostly from Northeast India with prominent ATB ancestry, is reflected through lower  
505 COVID-19 mortality rates from this region with Manipur, Mizoram, Nagaland and Sikkim  
506 not registering any COVID-19 related death as of 30<sup>th</sup> June 2020 [19]. Notably the  
507 death/recovery ratio in the largely ATB dominated region of Ladakh, India is 0.001,  
508 indicating almost complete recovery so far amidst COVID-19 infected individuals from this  
509 region.

510 Indian states with large number of indigenous tribal population with high prevalence  
511 of AAA ancestry and/or with large fractions of AASI-related ancestry, eg. Andaman and  
512 Nicobar Islands, Chhattisgarh, Jharkhand and Orissa have registered very few COVID related  
513 deaths till date (death/recovery ratio 0, 0.005, 0.008, 0.004 respectively). Furthermore, Tamil  
514 Nadu, despite ranking among the top three worst affected states in India, in terms of the  
515 numbers of COVID-19 positive cases have registered significantly lower COVID-19  
516 death/recovery ratio (0.02) that could be attributed to discernible fractions of AASI-related  
517 ancestry among the people from this area. This indicates that Indians with predominant AAA  
518 and AASI related ancestry may likely be less severely affected against the most detrimental  
519 effects of COVID-19 infection. On the other hand, states with predominant ANI ancestry  
520 such as Gujarat, Maharashtra, Madhya Pradesh and Delhi have shown discernibly higher  
521 COVID-19 mortality rates (0.08, 0.08, 0.06 and 0.05, respectively).

522 We also note that approximately 83% of WHG ancestry has been associated with  
523 mitochondrial DNA U haplogroup [49,50]. Overall, 13.1% Indians belong to U haplogroup  
524 and are thus associated with WHG related ancestry [51]. And the U haplogroup frequency  
525 shows discernible variation among Indian populations, while 23.3% North Indians belong to

526 U haplogroup, 10.3% South Indians belong to the same [51]. U haplogroup also shows  
527 discernible variation across Indian societal structure, while 15% of Indian upper castes  
528 belong to U haplogroup, 8% of Indian tribal populations (mostly of AAA ancestry) have the  
529 same [52]. Taken together, overall ~8-19% Indians are likely to have WHG related ancestry.  
530 Notably, our previous whole genome-based study found most Gujarati people to have ~3-4%  
531 WHG related ancestry [53], similar to what is observed for Turkish Jews in the current study.  
532 Our interrogation of worldwide populations suggests that the WHG ancestral fraction is  
533 likely associated with acute COVID-19 manifestations and is predictive of debilitating effects  
534 of COVID-19 infection among Indian populations with substantial fractions of WHG  
535 ancestry. Overall COVID-19 manifestations in India is likely to be somewhat intermediate to  
536 that observed in Europe and East Asia. This is also supported by the recent finding that allele  
537 frequencies of *ACE2* variants among Indians are intermediate between East Asians and  
538 Europeans [6].

539

#### 540 Limitations and conclusion

541

542 The present study shines light of underlying genetic signatures that may be associated with  
543 disparate COVID-19 severity and manifestations in worldwide populations. Nevertheless we  
544 note that the current work has been performed using publicly available genomic data and a  
545 more robust understanding in this regard will emanate from sequencing/genotyping  
546 endeavours for COVID-19 patients across the spectrum of varied nationalities/ancestries and  
547 geographical locations, including individuals with mild to moderate symptoms, severe  
548 manifestations and death. We further note that since the current analyses is performed using  
549 pre-existing genomic data, there is a disparity in number of individuals sequenced among  
550 various populations which might influence the analyses in terms of statistical power and  
551 errors.

552 We also note that populations from most European countries have higher mean ages  
553 compared to India, which may accentuate mortality rates among Europeans. However, as  
554 reported recently age alone may not suffice in exacerbating death/recovery ratios, and  
555 underlying health conditions such as cardiovascular disease, chronic kidney disease,  
556 hypertension, chronic respiratory disease, diabetes, cancers, HIV/AIDS, tuberculosis etc.,  
557 many of which are already described as crucial comorbidity factors for COVID-19 may  
558 modify disease manifestations and prognosis in patients [54]. It is imperative to consider here  
559 that although the mean population age is lower in India compared to most European

560 countries, 7.7% Indians suffer from diabetes [55], 25.3% suffer from hypertension [56] and  
561 approximately 14.5% suffer from some form of respiratory disorders linked to air pollution  
562 [57], all of which are underlying health conditions that are reported to cause higher COVID-  
563 19 death/recovery ratio [46]. Therefore, lower death/recovery ratio among Indians,  
564 particularly in specific populations compared to most European countries highlights the role  
565 of host genetic constitution in influencing COVID-19 disease progression.

566 Finally, several factors such as demographics (eg. population size and density),  
567 healthcare facilities and hospital infrastructure, administrative preparedness and  
568 implementation of social isolation and lockdowns were beyond the scope of the current study  
569 but may influence the death/recovery metric of a country. Taken together our results strongly  
570 advocate for the adoption of a rigorous worldwide population genetics driven approach to  
571 expand and substantiate our current knowledge of SARS-CoV-2 infection, as well as  
572 facilitate the development of population specific therapeutics to mitigate this worldwide  
573 challenge.

574

## 575 **References**

576

- 577 1. Laboratory testing of 2019 novel coronavirus (2019-nCoV) in suspected human cases:  
578 interim guidance, 17 January 2020 [Internet]. [cited 2020 Apr 9]. Available from:  
579 <https://apps.who.int/iris/handle/10665/330676>
- 580 2. Dong E, Du H, Gardner L. An interactive web-based dashboard to track COVID-19 in  
581 real time. *Lancet Infect Dis* 2020 20(5):533-534 PMID:32087114
- 582 3. Verity R, Okell LC, Dorigatti I, Winskill P, Whittaker C, Imai N, et al. Estimates of  
583 the severity of coronavirus disease 2019: a model-based analysis. *Lancet Infect Dis*  
584 2020 20(6):669-677. PMID: 32240634
- 585 4. Zhou P, Yang X-L, Wang X-G, Hu B, Zhang L, Zhang W, et al. A pneumonia  
586 outbreak associated with a new coronavirus of probable bat origin. *Nature* 2020  
587 Mar;579(7798):270-273. PMID:32015507
- 588 5. Lu R, Zhao X, Li J, Niu P, Yang B, Wu H, et al. Genomic characterisation and  
589 epidemiology of 2019 novel coronavirus: implications for virus origins and receptor  
590 binding. *The Lancet* 2020 Feb;395(10224):565–574. PMID: 32007145
- 591 6. Cao Y, Li L, Feng Z, Wan S, Huang P, Sun X, et al. Comparative genetic analysis of  
592 the novel coronavirus (2019-nCoV/SARS-CoV-2) receptor ACE2 in different  
593 populations. *Cell Discov* 2020 Dec;6(1):11. PMID: 32133153

- 594 7. Stawiski EW, Diwanji D, Suryamohan K, Gupta R, Fellouse FA, Sathirapongsasuti F,  
595 Liu J, Jiang YP, Ratan A, Mis M, Santhosh D. Human ACE2 receptor polymorphisms  
596 predict SARS-CoV-2 susceptibility. *bioRxiv*. 2020 Jan 1.
- 597 8. Li G, Fan Y, Lai Y, Han T, Li Z, Zhou P, et al. Coronavirus infections and immune  
598 responses. *J Med Virol* 2020 Apr;92(4):424–432. PMID: 31981224
- 599 9. Nguyen A, David JK, Maden SK, Wood MA, Weeder BR, Nellore A, Thompson RF.  
600 Human leukocyte antigen susceptibility map for SARS-CoV-2. *Journal of virology*.  
601 2020 Jun 16;94(13):e00510-20. PMID: 32303592.
- 602 10. Kuo CL, Pilling LC, Atkins JL, Masoli JA, Delgado J, Kuchel GA, et al. APOE e4  
603 genotype predicts severe COVID-19 in the UK Biobank community cohort. *J*  
604 *Gerontol A Biol Sci Med Sci* 2020 May 26;glaa131. PMID: 32451547
- 605 11. Quach H, Rotival M, Pothlichet J, Loh Y-HE, Dannemann M, Zidane N, et al.  
606 Genetic Adaptation and Neandertal Admixture Shaped the Immune System of Human  
607 Populations. *Cell* 2016 Oct 20;167(3):643-656.e17. PMID:27768888
- 608 12. Mathieson I, Alpaslan-Roodenberg S, Posth C, Szécsényi-Nagy A, Rohland N,  
609 Mallick S, et al. The genomic history of southeastern Europe. *Nature* 2018  
610 Mar;555(7695):197–203. PMID: 29466330
- 611 13. Olalde I, Brace S, Allentoft ME, Armit I, Kristiansen K, Booth T, et al. The Beaker  
612 phenomenon and the genomic transformation of northwest Europe. *Nature* 2018  
613 Mar;555(7695):190–196. PMID: 29466337
- 614 14. Olalde I, Mallick S, Patterson N, Rohland N, Villalba-Mouco V, Silva M, et al. The  
615 genomic history of the Iberian Peninsula over the past 8000 years. *Science* 2019 Mar  
616 15;363(6432):1230–1234. PMID: 30872528
- 617 15. Kachuri L, Francis SS, Morrison M, Bossé Y, Cavazos TB, Rashkin SR, et al. The  
618 landscape of host genetic factors involved in infection to common viruses and SARS-  
619 CoV-2. *medRxiv*. 2020 Jan 1. PMID: 32511533
- 620 16. David Reich Lab datasets URL <https://reich.hms.harvard.edu/datasets> [accessed 2020-  
621 03-25]
- 622 17. Price AL, Patterson NJ, Plenge RM, Weinblatt ME, Shadick NA, Reich D. Principal  
623 components analysis corrects for stratification in genome-wide association studies.  
624 *Nat Genet* 2006 Aug;38(8):904–909. PMID: 16862161
- 625 18. Purcell S, Neale B, Todd-Brown K, Thomas L, Ferreira MAR, Bender D, et al.  
626 PLINK: A Tool Set for Whole-Genome Association and Population-Based Linkage  
627 Analyses. *Am J Hum Genet* 2007 Sep;81(3):559–575. PMID: 17701901

- 628 19. India COVID-19 statewise status URL [https://www.mygov.in/corona-data/covid19-](https://www.mygov.in/corona-data/covid19-statewise-status)  
629 [statewise-status](https://www.mygov.in/corona-data/covid19-statewise-status)
- 630 20. Haak W, Lazaridis I, Patterson N, Rohland N, Mallick S, Llamas B, et al. Massive  
631 migration from the steppe was a source for Indo-European languages in Europe.  
632 Nature 2015 Jun;522(7555):207–211. PMID: 25731166
- 633 21. Patterson N, Moorjani P, Luo Y, Mallick S, Rohland N, Zhan Y, et al. Ancient  
634 Admixture in Human History. Genetics 2012 Nov;192(3):1065–1093. PMID:  
635 22960212
- 636 22. Alexander DH, Novembre J, Lange K. Fast model-based estimation of ancestry in  
637 unrelated individuals. Genome Res 2009 Sep 1;19(9):1655–1664. PMID: 19648217
- 638 23. Lazaridis I, Nadel D, Rollefson G, Merrett DC, Rohland N, Mallick S, et al. Genomic  
639 insights into the origin of farming in the ancient Near East. Nature. 2016  
640 Aug;536(7617):419-24.
- 641 24. Graphpad Prism 8 URL [www.graphpad.com](http://www.graphpad.com)
- 642 25. Time and Date website URL <https://www.timeanddate.com/>
- 643 26. World Meteorological Organization URL <https://public.wmo.int/en>
- 644 27. Meteorological Assimilation Data Ingest System (MADIS) URL  
645 <https://madis.ncep.noaa.gov/>
- 646 28. Team QD. 2016. QGIS geographic information system. Open Source Geospatial  
647 Foundation Project. URL <http://qgis.osgeo.org>
- 648 29. Barrett JC, Fry B, Maller J, Daly MJ. Haploview: analysis and visualization of LD  
649 and haplotype maps. Bioinformatics 2005 Jan 15;21(2):263–265. PMID: 15297300
- 650 30. Dayem Ullah AZ, Oscanoa J, Wang J, Nagano A, Lemoine NR, Chelala C.  
651 SNPnexus: assessing the functional relevance of genetic variation to facilitate the  
652 promise of precision medicine. Nucleic Acids Res 2018 Jul 2;46(W1):W109–W113.  
653 PMID: 29757393
- 654 31. Ramlall V, Thangaraj PM, Tatonetti NP, Shapira SD. Identification of Immune  
655 complement function as a determinant of adverse SARS-CoV-2 infection outcome.  
656 medRxiv. 2020 Jan 1. PMID: 32511494
- 657 32. Coperchini F, Chiovato L, Croce L, Magri F, Rotondi M. The cytokine storm in  
658 COVID-19: an overview of the involvement of the chemokine/chemokine-receptor  
659 system. Cytokine & Growth Factor Reviews. 2020 May 11. PMID: 32446778
- 660 33. SNPedia URL <https://www.snpedia.com>



- 661 34. Lipson M, Szécsényi-Nagy A, Mallick S, Pósa A, Stégnár B, Keerl V, et al. Parallel  
662 palaeogenomic transects reveal complex genetic history of early European farmers.  
663 Nature 2017 Nov;551(7680):368–372. PMID: 29144465
- 664 35. Morozova I, Evsyukov A, Kon'kov A, Grosheva A, Zhukova O, Rychkov S. Russian  
665 ethnic history inferred from mitochondrial DNA diversity. Am J Phys Anthropol 2012  
666 Mar;147(3):341-51. PMID: 22183855
- 667 36. Lamnidis TC, Majander K, Jeong C, Salmela E, Wessman A, Moiseyev V, et al.  
668 Ancient Fennoscandian genomes reveal origin and spread of Siberian ancestry in  
669 Europe. Nat commun. 2018 Nov 27;9(1):5018. PMID:30479341
- 670 37. Lazaridis I, Patterson N, Mittnik A, Renaud G, Mallick S, Kirsanow K, Sudmant PH,  
671 Schraiber JG, Castellano S, Lipson M, Berger B. Ancient human genomes suggest  
672 three ancestral populations for present-day Europeans. Nature. 2014  
673 Sep;513(7518):409-13. PMID:25230663
- 674 38. Alkan C, Kavak P, Somel M, Gokcumen O, Ugurlu S, Saygi C, et al. Whole genome  
675 sequencing of Turkish genomes reveals functional private alleles and impact of  
676 genetic interactions with Europe, Asia and Africa. BMC genomics. 2014 Dec  
677 1;15(1):963. PMID:25379065
- 678 39. Haber M, Mezzavilla M, Xue Y, Comas D, Gasparini P, Zalloua P, et al. Genetic  
679 evidence for an origin of the Armenians from Bronze Age mixing of multiple  
680 populations. European Journal of Human Genetics. 2016 Jun;24(6):931-6.  
681 PMID:26486470
- 682 40. Keller A, Graefen A, Ball M, Matzas M, Boisguerin V, Maixner F, Leidinger P, et al.  
683 New insights into the Tyrolean Iceman's origin and phenotype as inferred by whole-  
684 genome sequencing. Nat commun. 2012 Feb 28;3(1):1-9. PMID:22426219
- 685 41. Tham TY, Tran TL, Prueksaritanond S, Isidro JS, Setia S, Welluppillai V. Integrated  
686 health care systems in Asia: an urgent necessity. Clinical interventions in aging.  
687 2018;13:2527. PMID:30587945
- 688 42. Wang C-C, Yeh H-Y, Popov AN, Zhang H-Q, Matsumura H, Sirak K, et al. The  
689 Genomic Formation of Human Populations in East Asia [Internet]. Genomics; 2020  
690 Mar. [doi: 10.1101/2020.03.25.004606]
- 691 43. Lipson M, Cheronet O, Mallick S, Rohland N, Oxenham M, Pietrusewsky M, et al.  
692 Ancient genomes document multiple waves of migration in Southeast Asian  
693 prehistory. Science 2018 Jul 6;361(6397):92–95. PMID: 29773666



- 694 44. Shinde V, Narasimhan VM, Rohland N, Mallick S, Mah M, Lipson M, et al. An  
695 Ancient Harappan Genome Lacks Ancestry from Steppe Pastoralists or Iranian  
696 Farmers. *Cell* 2019 Oct;179(3):729-735.e10. PMID: 31495572
- 697 45. Narasimhan VM, Patterson N, Moorjani P, Rohland N, Bernardos R, Mallick S, et al.  
698 The formation of human populations in South and Central Asia. *Science* 2019 Sep  
699 6;365(6457):eaat7487. PMID: 31488661
- 700 46. Basu A, Sarkar-Roy N, Majumder PP. Genomic reconstruction of the history of extant  
701 populations of India reveals five distinct ancestral components and a complex  
702 structure. *Proc Natl Acad Sci* 2016 Feb 9;113(6):1594–1599. PMID: 26811443
- 703 47. Tätte K, Pagani L, Pathak AK, Köks S, Ho Duy B, Ho XD, et al. The genetic legacy  
704 of continental scale admixture in Indian Austroasiatic speakers. *Sci Rep* 2019  
705 Apr;9(1):6104. PMID:30967570
- 706 48. Gneccchi-Ruscione GA, Jeong C, De Fanti S, Sarno S, Trancucci M, Gentilini D, et al.  
707 The genomic landscape of Nepalese Tibeto-Burmans reveals new insights into the  
708 recent peopling of Southern Himalayas. *Sci Rep* 2017 Dec;7(1):15512. PMID:  
709 29138459
- 710 49. Molto JE, Loreille O, Mallott EK, Malhi RS, Fast S, Daniels-Higginbotham J, et al.  
711 Complete mitochondrial genome sequencing of a burial from a romano–christian  
712 cemetery in the Dakhleh Oasis, Egypt: preliminary indications. *Genes*. 2017  
713 Oct;8(10):262. PMID:28984839
- 714 50. Fu Q, Rudan P, Pääbo S, Krause J. Complete mitochondrial genomes reveal Neolithic  
715 expansion into Europe. *PloS one*. 2012 Mar 13;7(3):e32473. PMID:22427842
- 716 51. Kivisild T, Bamshad MJ, Kaldma K, Metspalu M, Metspalu E, Reidla M, et al. Deep  
717 common ancestry of Indian and western-Eurasian mitochondrial DNA lineages.  
718 *Current Biology*. 1999 Nov 18;9(22):1331-4. PMID:10574762
- 719 52. Karmin M. Human mitochondrial DNA haplogroup R in India: Dissecting the  
720 phylogenetic tree of South Asian-specific lineages [Master’s thesis]. University of  
721 Tartu; 2005.
- 722 53. Das R, Upadhyai P. Investigating the west Eurasian ancestry of Pakistani Hazaras.  
723 *Journal of genetics*. 2019 Jun 1;98(2):43. PMID:31204712
- 724 54. Clark A, Jit M, Warren-Gash C, Guthrie B, Wang HH, Mercer SW, et al. Global,  
725 regional, and national estimates of the population at increased risk of severe COVID-  
726 19 due to underlying health conditions in 2020: a modelling study. *Lancet Glob  
727 Health*. 2020 Jun 15. PMID:32553130

728 55. Tandon N, Anjana RM, Mohan V, Kaur T, Afshin A, Ong K, et al. The increasing  
729 burden of diabetes and variations among the states of India: the Global Burden of  
730 Disease Study 1990–2016. *The Lancet Global Health*. 2018 Dec 1;6(12):e1352-62.  
731 PMID:30219315

732 56. Jose AP, Prabhakaran D. World Hypertension Day: Contemporary issues faced in  
733 India. *The Indian journal of medical research*. 2019 May;149(5):567-570.  
734 PMID:31417023

735 57. Singh V, Sharma BB. Respiratory disease burden in India: Indian chest society  
736 SWORD survey. *Lung India: Official Organ of Indian Chest Society*. 2018  
737 Nov;35(6):459-460. PMID:30381552

738  
739  
740  
741  
742  
743  
744  
745  
746  
747  
748  
749  
750  
751  
752  
753  
754  
755  
756  
757  
758  
759  
760  
761  
762  
763

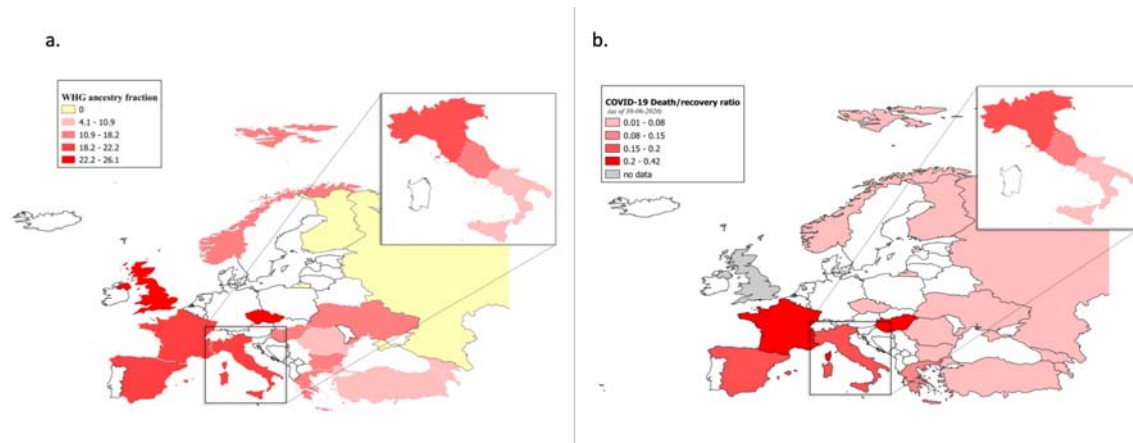

764

765 Fig. 1: Maps showing WHG ancestry fractions (a) and COVID-19 death/recovery ratio as of  
766 30<sup>th</sup> June 2020 (b) in various European countries. Maps were plotted in QGIS software  
767 (<http://qgis.osgeo.org>). To show gradient decrease in WHG ancestry fractions, WHG ancestry  
768 proportion in Central Italy (a: inset) was calculated by taking an average of WHG ancestry  
769 proportions of Northern (23.1%) and Southern (9.2%) Italy. Finland and Russia which could  
770 not be modelled to WHG ancestry are shown in yellow (a) and since current COVID-19  
771 recovery rate in UK is unknown, it is shown in grey (b).

772

773

774

775

776

777

778

779

780

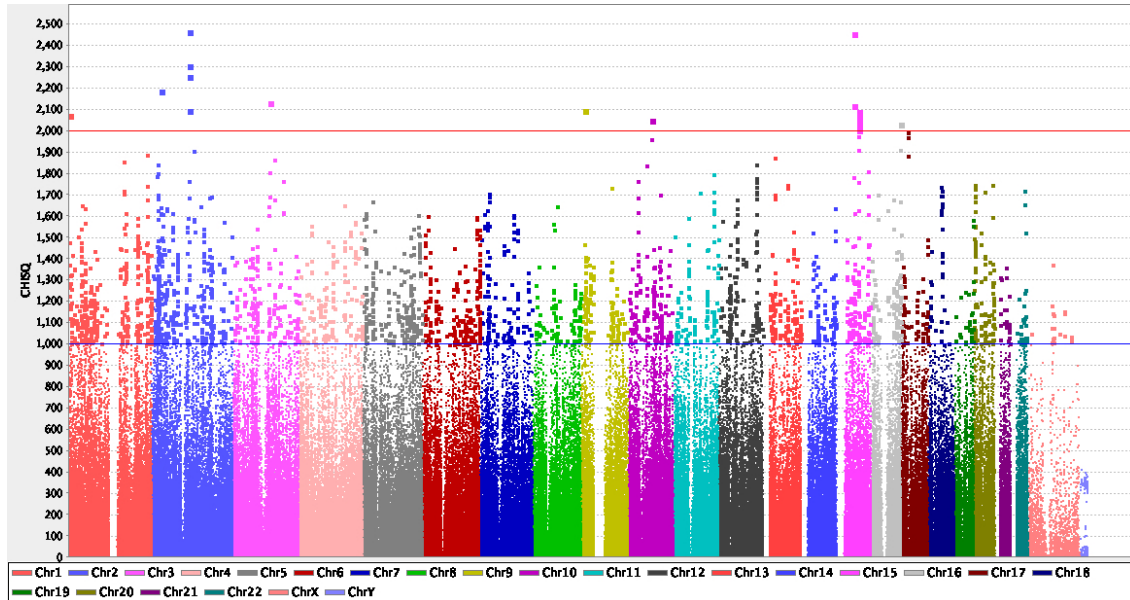

781

782

783 Fig.2: Manhattan Plot. X-axis represents chromosomes (chr 1 to chr Y). SNPs present in the  
784 chromosomes are designated with dots. The chi square values are plotted in Y-axis. GWAS  
785 with 753 European genomes were compared to 838 Eastern Asian genomes. Out of 597,573  
786 SNPs employed, 385,450 (64.5%) markers revealed highly significant variation between  
787 Europeans and East Asians. The SNPs with chi square values >1000 are indicated with the  
788 blue line and those with chi square value >2000 are indicated with the red line. While 18  
789 SNPs showed chi square values >2000, 2,992 SNPs had chi square values >1000.

790

791

792

793

794

795

796

a.

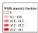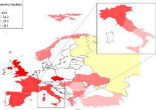

b.

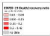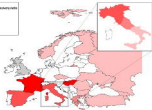

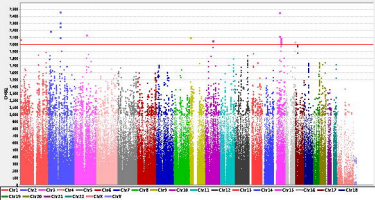

Source: https://medrxiv.org/content/10.1101/2020.04.05.20054627v3.full.pdf
